# Supplementary material for: Development of a versatile HPLC-based method to evaluate the activation status of small GTPases
Source: PubMed Central journal article supplement (PMC8668980; doi:10.1016/j.jbc.2021.101428), 2021-11-19
Supplement: mmc1.pdf [file mmc1.pdf]

## **Supporting Information**

### **Title:**

Development of a versatile HPLC-based method to evaluate the activation status of small GTPases

### **Authors:**

Makoto Araki, Kaho Yoshimoto, Meguri Ohta, Toshiaki Katada, Kenji Kontani

### **Included materials:**

Figure S1-S2

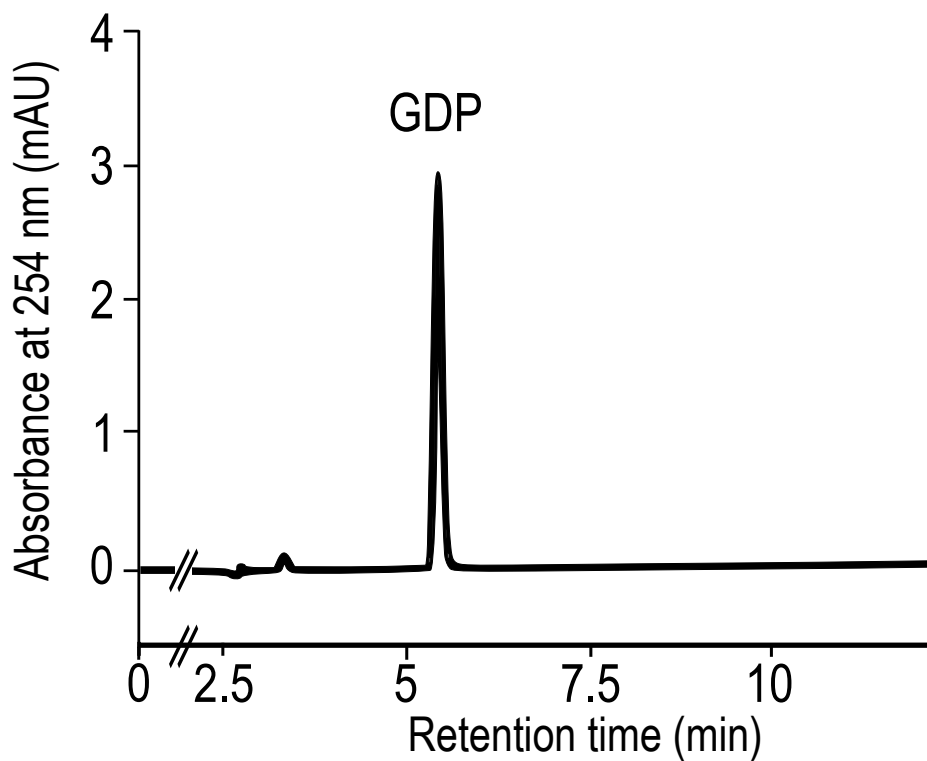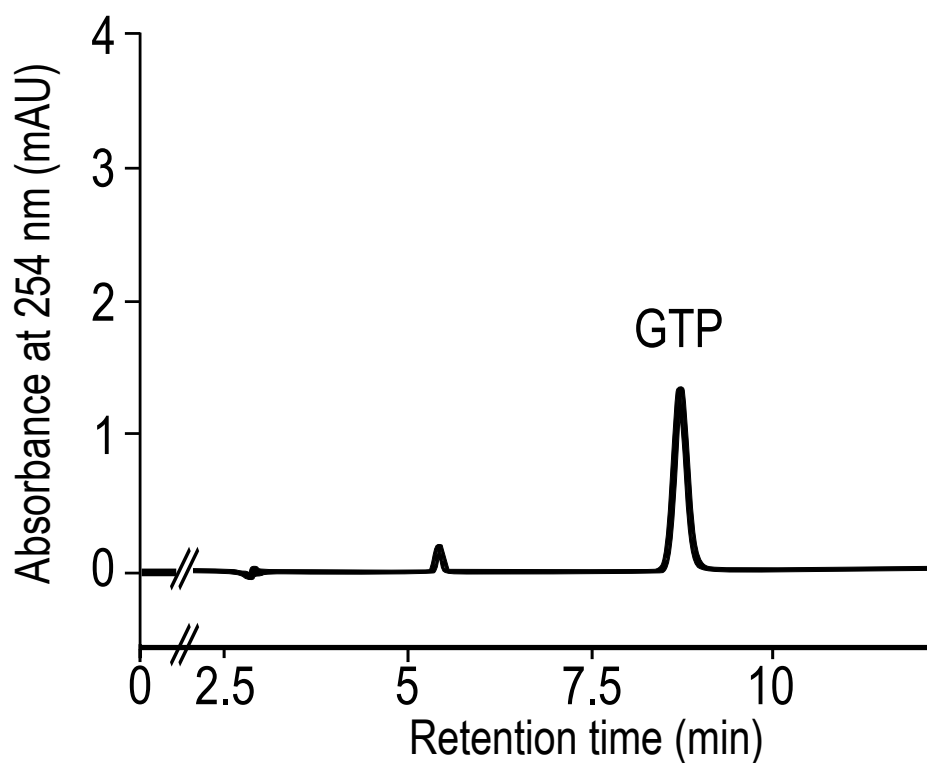

**Figure S1. IP-RP-HPLC analysis of GDP and GTP.**

Representative chromatograms of GDP (*upper panel*) and GTP (*lower panel*) (each 10 pmol) using IP-RP-HPLC. The nucleotides were detected by a UV detector at a wavelength of 254 nm. The peaks of GDP and GTP were detected at 5.4 and 8.6 min, respectively, on chromatograms.

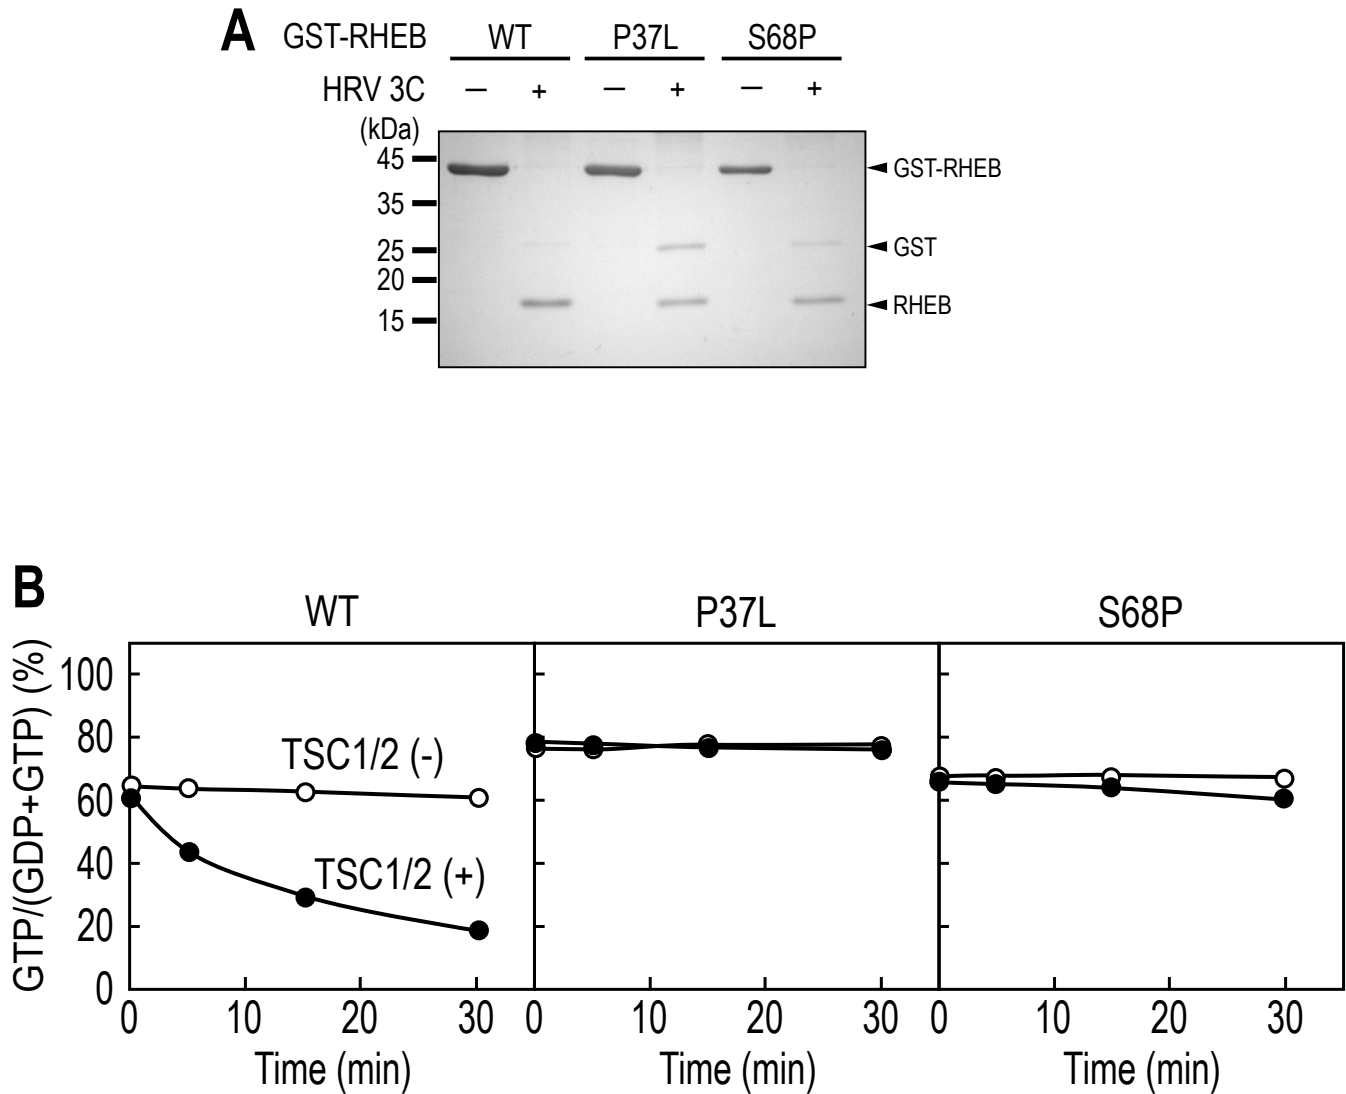

**Figure S2. Preparation of untagged RHEB proteins and effect of the TSC1/2 complex on the RHEB GTPase activity.**

(A) SDS-PAGE analysis of untagged RHEB proteins (Coomassie Brilliant Blue staining). GST-RHEB fusion proteins were completely cleaved with HRV3C protease, and the released GST was removed by incubation with Glutathione Sepharose 4B. Most of GST was removed from the mixture for RHEB/WT, whereas some amount of GST remained for RHEB/P37L and RHEB/S68P. (B) The untagged RHEB proteins were incubated at 30°C without (*open circle*) or with (*closed circle*) Flag-TSC1/2 immunoprecipitation beads at the indicated times, and the aliquots were subjected to IP-RP-HPLC analysis. Data are the means from two independent experiments.
